# Supplementary material for: Methane bubbling from Siberian thaw lakes as a positive feedback to climate warming
Source: Springer Nature journal article supplement (doi:10.1038/nature05040), 2006-09-01
Supplement: 41586_2006_BFnature05040_MOESM1_ESM.pdf [file 41586_2006_BFnature05040_MOESM1_ESM.pdf]

## Supplementary Information

### Supplementary Figures

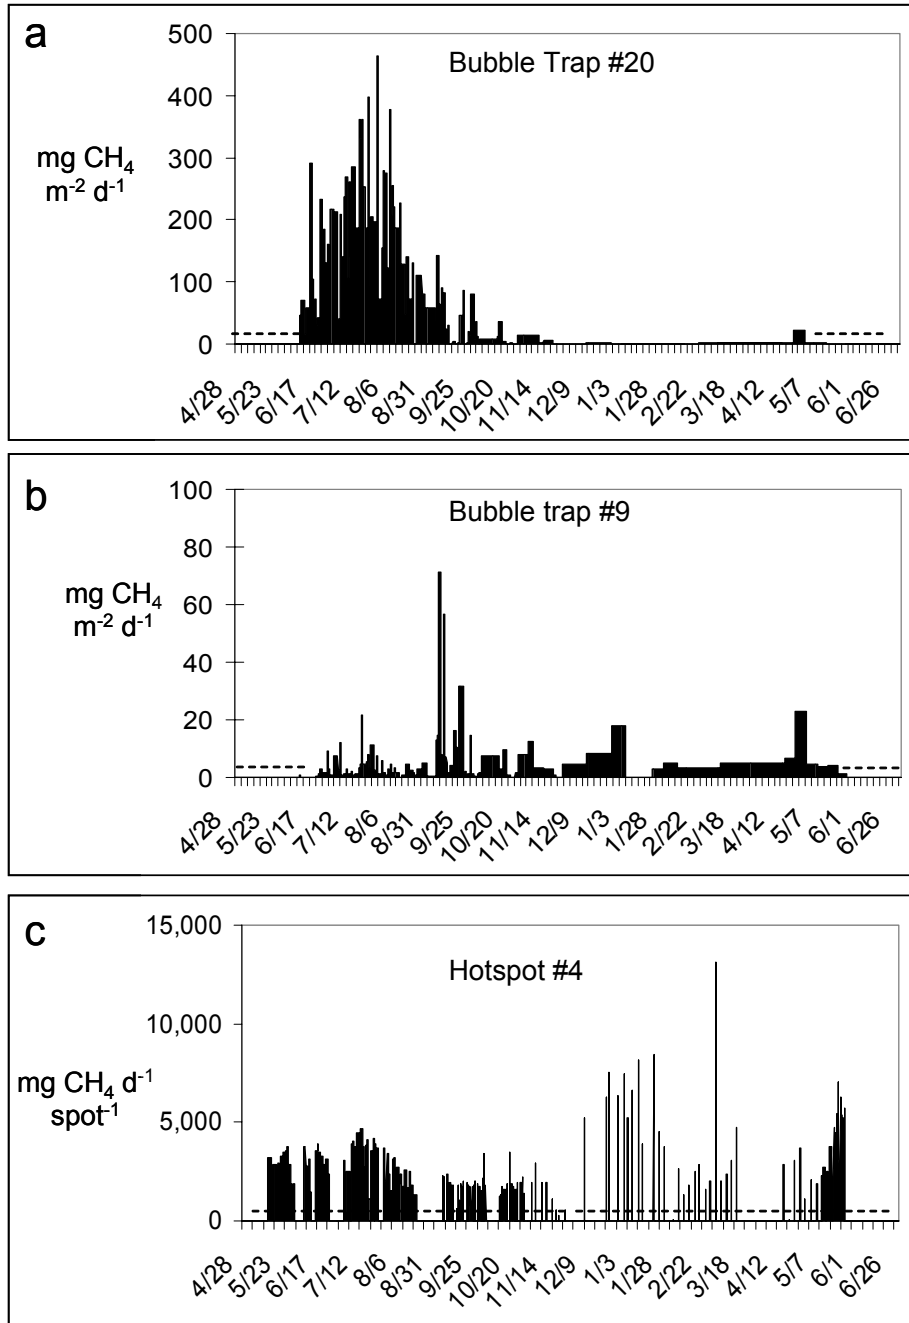

Supplementary Figure 1. Ebullition dynamics captured by daily measurements during 2003-04 in single bubble traps floating at randomly located points where water was 2-m deep (a) and 10-m deep (b). We secured traps over individual hotspots (c). In summer, hotspot traps were sampled daily as they filled often with >15L of gas each day; but in winter when logistics necessitated less frequent sampling, we measured hotspot fluxes over the course of several hours to prevent umbrellas from overflowing and freezing into the ice. We verified that hourly flux rates were not different from daily flux rates. Dashed lines represent periods of 'no-data'.

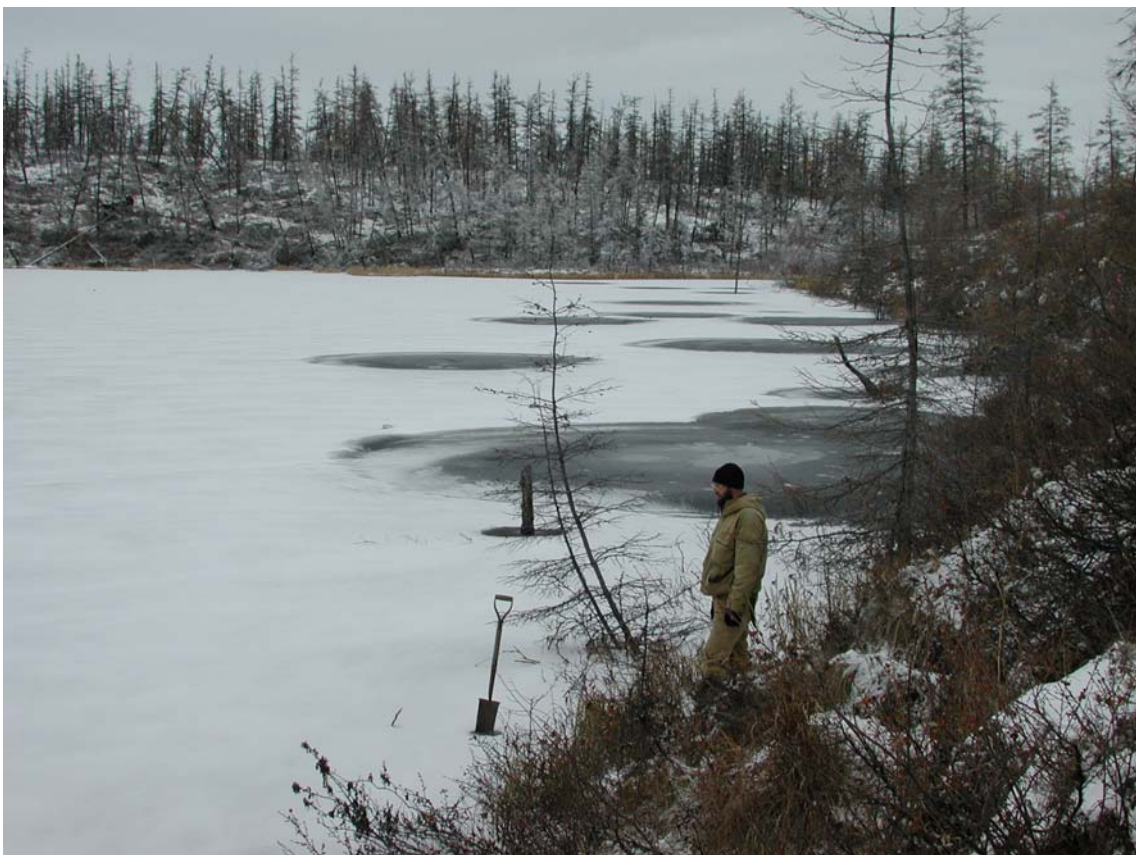

Supplementary Figure 2. Photograph of hotspots along thermokarst lake margin. Methane emissions along thermokarst margins ( $128 \text{ g CH}_4 \text{ m}^{-2} \text{ yr}^{-1}$ ) exceeded whole lake average emissions ( $24.9 \text{ g CH}_4 \text{ m}^{-2} \text{ yr}^{-1}$ ) in the

intensively studied lakes because of a higher abundance of hotspots and point sources of ebullition in the thermokarst zone. Hotspots in the photograph, which was taken in October 2003 at Shuchi Lake, are open holes in ice inside the dark rings of wet snow.

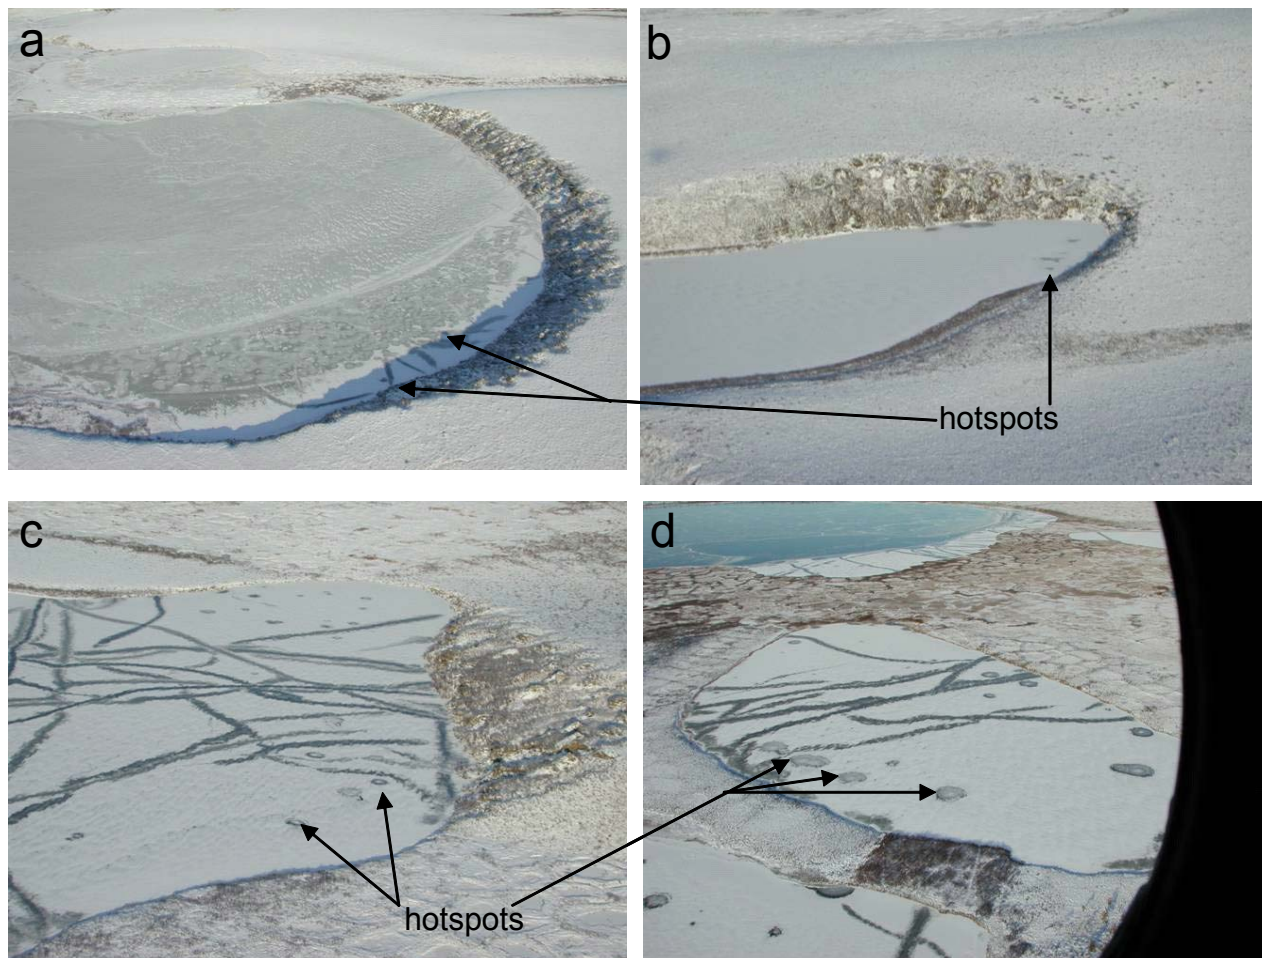

Supplementary Figure 3. Black-hole hotspots (dark round spots) mark the zone of enhanced methane emissions due to thermokarst erosion. We sorted aerial photographs of 60 lakes into two categories reflecting lakes with moderate and intense thermokarst erosion. Half of the lakes exhibited moderate erosion, with black-hole hotspots occurring primarily in a narrow zone 15-m from the thermokarst margin (panels *a* and *b*, as well as our two intensively studied lakes). This zone was  $15.8 \pm 2.2\%$  of lake area in our intensively studied lakes.



Black-hole hotspots extended >30-m into the lake away from thaw margins in the other half of the photos (panels c and d), suggesting that these lakes have a recent history of more intense thermokarst erosion. Due to a lack of coordinates for lakes in aerial photographs we were unable to directly link the GIS lake change analysis to hotspot distributions in the photographs. To extrapolate CH<sub>4</sub> fluxes to these lakes, we applied flux rates measured along thermokarst margins of our intensive study lakes (128 g CH<sub>4</sub> m<sup>-2</sup> yr<sup>-1</sup>) to a doubly large zone of thermokarst influence (31.6% of lake area).

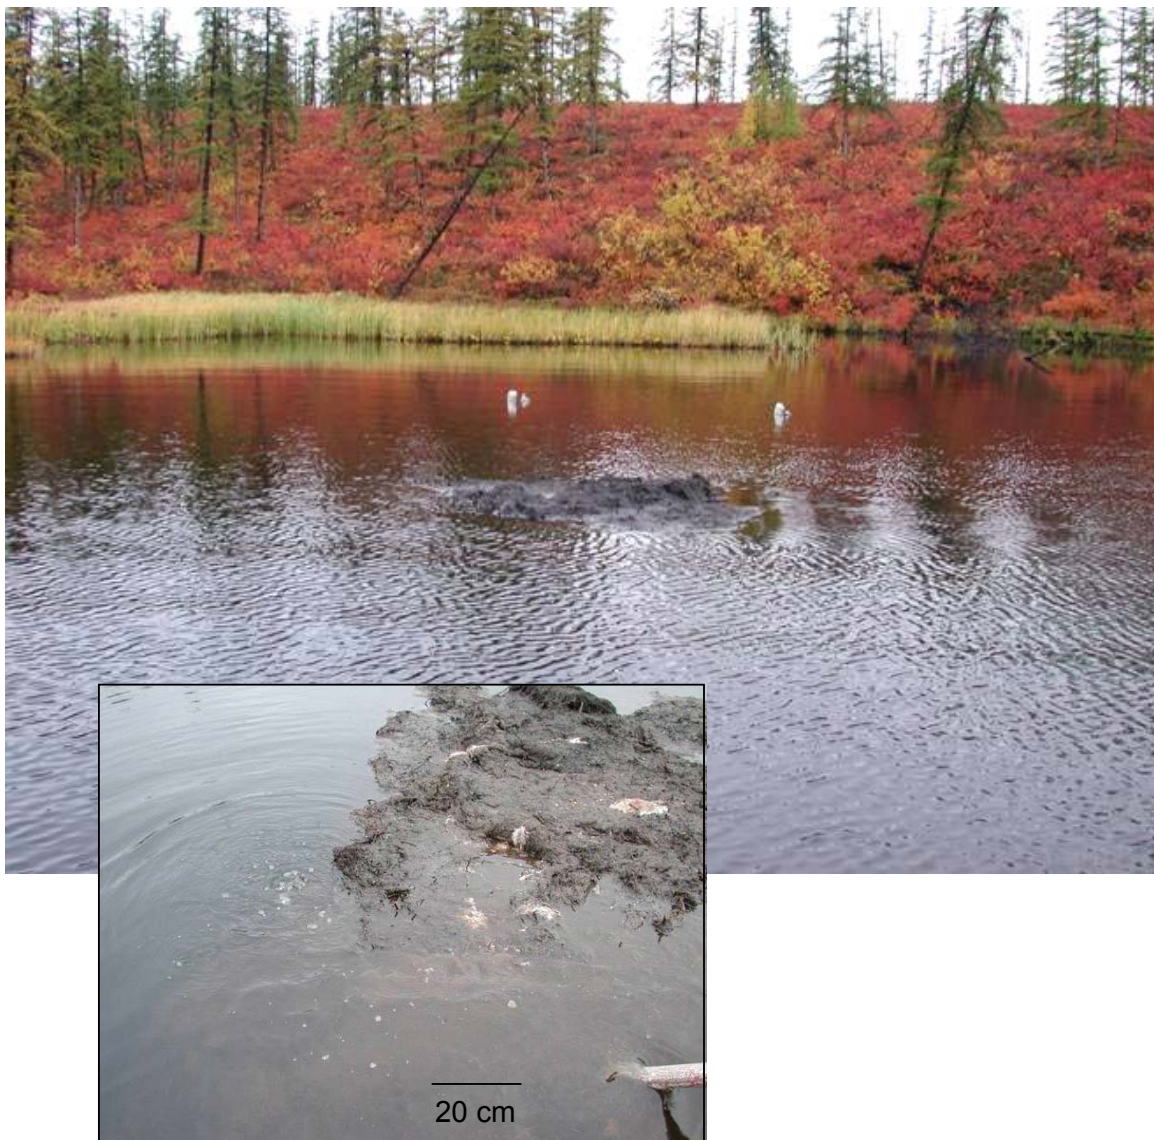

Supplementary Figure 4. Large, rare emission events. Some CH<sub>4</sub> emission events are unpredictable, but may be of large magnitude. Three times we observed geysers of lake gas released during a >30-second episode, which created an eruption cone that stood several centimeters above the lake water surface (not shown). In August of 2002 and 2003 we used video and photography to document large plumes of CH<sub>4</sub> that lifted thick peat mats (12 m<sup>2</sup>) from the bottom of thermokarst lakes 4-8 m to the surface (below). These lake bottom islands floated at the lake surface for 3-6 days releasing CH<sub>4</sub>, before sinking back to the lake bottom. Methane bubbled out from the mat when we disturbed it with a pole.

## **Supplementary Methods**

### **Methane concentration and isotope analysis of ebullition measured by bubble traps**

During winter, we measured every 3-4 days the volume of gas collected continuously in bubble traps suspended beneath the ice. Measurements were daily during the ice-free season. In total, we made 2,981 individual measurements of bubble volumes collected in bubble traps. Methane concentration of bubbles was  $79.6 \pm 1.1\%$  CH<sub>4</sub> (n=36), as measured by gas chromatography using a thermal conductivity detector (TCD Shimadzu 8A) and a flame ionization detector (FID Shimadzu 6A). For isotope analyses, gas samples were collected directly into glass serum vials from ebullition flux, sealed with Butyl rubber stoppers, and stored at 4° C. We measured <sup>13</sup>C/<sup>12</sup>C of CH<sub>4</sub> by direct injection with a syringe using gas chromatography/mass spectrometry (Hewlett-Packard 5890 Series II GC coupled to a Finnigan MAT Delta S). A subsample of gas was combusted to CO<sub>2</sub> and catalytically reduced to graphite<sup>31</sup>, and its <sup>14</sup>C/<sup>12</sup>C values

measured by atomic mass spectrometry at the Keck Carbon Cycle AMS Facility at the University of California, Irvine. We determined D/H of CH<sub>4</sub> on a Finnigan MT delta +XP using a Trace GC with a poroplot column and the reduction column set at 1450°C.

### **Methane fluxes from point sources and hotspots**

We made detailed, continuous measurements of three categories of point sources identified by distinct patterns of bubble stacks in lake ice from 10/9-10/29/2003 (n=6-8 traps per category): *kotenok* (stacks of small individual, unmerged bubbles,  $25 \pm 12$  mg CH<sub>4</sub> d<sup>-1</sup> spot<sup>-1</sup>), *koshka* (merged bubbles clustered in multiple layers of ice,  $190 \pm 172$  mg CH<sub>4</sub> d<sup>-1</sup> spot<sup>-1</sup>), *kotara* (single large pockets of merged bubbles in ice,  $825 \pm 348$  mg CH<sub>4</sub> d<sup>-1</sup> spot<sup>-1</sup>) and open-hole *hotspots* ( $2175 \pm 1195$  mg CH<sub>4</sub> d<sup>-1</sup> spot<sup>-1</sup>) (ANOVA,  $F=16.23_{3,27}$   $p<.0001$ ) (Fig. 1). Unlike other point sources, seasonal averages for hotspots were derived from year-round measurements using bubble traps ( $1754 \pm 690$  mg CH<sub>4</sub> d<sup>-1</sup> spot<sup>-1</sup>, n=4 traps summer;  $2125 \pm 1222$  mg CH<sub>4</sub> d<sup>-1</sup> spot<sup>-1</sup>, n=10 traps winter). In contrast, average flux by molecular diffusion was  $10 \pm 1.8$  mg CH<sub>4</sub> m<sup>-2</sup> d<sup>-1</sup> during the summer.

The CH<sub>4</sub> concentration in point-source bubbles trapped in lake ice in spring before any thawing occurred ( $53.6 \pm 1.6$  % CH<sub>4</sub>; n=3) was similar to earlier observations (50% CH<sub>4</sub>, n=8 *koshkas*)<sup>3</sup> and 33% less than in fresh lake bubbles (80%). When applying CH<sub>4</sub> concentrations to the bubble volume measurements, we used 54% CH<sub>4</sub> in our calculation of wintertime ‘point-source’ and ‘background’ ebullition, and 80% for all other ebullition.

## Supplementary Equations

### Whole lake emission estimation

We estimate whole-lake CH<sub>4</sub> emissions  $M_{tot}$  as the average of two intensively studied lakes, ( $24.9 \pm 2.3$  mg CH<sub>4</sub> m<sup>-2</sup> yr<sup>-1</sup>): where

$$M_{tot} = \sum_{z=1}^3 A_z (M_{dz} + M_{hz} + M_{pz} + M_{bz}) \quad (1)$$

$z$  = The 3 major lake zones: shallow thermokarst margins, non-thermokarst margins, and the deeper center of lakes.

$A_z$  = area of each zone (fraction of lake area).

$M_d$  = Diffusive flux estimated from biweekly surface water concentrations of CH<sub>4</sub> measured during the ice-free summer period in the lake center<sup>14</sup> (mg CH<sub>4</sub> m<sup>-2</sup> yr<sup>-1</sup>).

$M_h$  = Density of hotspots (No. points m<sup>-2</sup>) \* mean flux per hotspot (mg CH<sub>4</sub> season<sup>-1</sup>) for summer (n=4 hotspots) and winter (n=10 hotspots).

$$M_p = t \sum_{s=1}^3 \rho_s M_s \quad (2)$$

where  $\rho_s$  is the density of each point source (No. points m<sup>-2</sup>,  $s$  = point source type: kotenok (1), koshka (2), or kotara (3));  $M_s$  is the mean flux per point source (mg CH<sub>4</sub> day<sup>-1</sup> in October; n = 6-8 traps per point source type); and  $t$  is 365 days per year. This extrapolation is conservative because October point source ebullition appeared to be lower than at other times of year (data not shown).

$M_b$  = Average seasonal bubble fluxes determined for randomly situated traps (background ebullition) as a summation of interpolation of daily fluxes during winter and summer. Background traps were monitored year round with 2-10 traps per lake zone. The complete table of North Siberian methane emission sources detailed for each lake is provided in Supplementary Information.

### Regional extrapolation

Regional estimates  $M_{yedoma}$  (3.8 Tg CH<sub>4</sub> yr<sup>-1</sup>) were extrapolated from whole lake fluxes as follows:

$$M_{yedoma} = A_{yedoma} * P_{lakes} * 0.5(M_{1tot} + M_{2tot}) \quad (3)$$

Where  $A_{yedoma}$  is 1x10<sup>6</sup> km<sup>2</sup>;  $P_{lakes}$  is 0.11 fractional lake cover;  $M_{1tot}$  is 24.9 g CH<sub>4</sub> m<sup>-2</sup> yr<sup>-1</sup>, representing half of the region's lakes with modest erosion; and  $M_{2tot}$  is 43.7 CH<sub>4</sub> m<sup>-2</sup> yr<sup>-1</sup>, the flux from the other half of the region's lakes with intense thermokarst erosion and extensive hotspots.

This 11% lake cover estimate, based on our GIS analysis, is conservative relative to the range reported in the literature (8.5 to >30%) (ref. 3,9,23). To lend support to the assumption that our estimates of CH<sub>4</sub> flux are representative, we verified that 2003-2004 had temperature and precipitation inputs typical of the study period, 1970-2004, based on observations made at the Cherskii Meteorological Station (data not shown). The mean annual temperature during 2003-2004 spans the current trend line for this region<sup>28</sup> (Fig. 3).



## Supplementary Tables

**Supplementary Table 1. Sources of variability in our estimate of Siberian thaw lake CH<sub>4</sub> emissions for yedoma territory. By documenting ebullition patchiness, we were able to assess sources of uncertainty in our regional estimate of CH<sub>4</sub>. Within-lake sources of variability, such as errors associated with point source fluxes, led to a smaller range of variability for regional estimates (2.4-5.1 Tg CH<sub>4</sub> yr<sup>-1</sup>) than percentage of the region occupied by lakes (2.9-10.3 Tg CH<sub>4</sub> yr<sup>-1</sup>). Since our extrapolation is based on the conservative estimate of lake area, actual regional emissions could be higher.**

Calculations are based on mean values of point source density per unit lake area and the mean flux per point source type in our intensively studied lakes. Here we present the potential effect of the largest sources of variability around the whole-lake and regional means (34.3 g CH<sub>4</sub> m<sup>-2</sup> yr<sup>-1</sup>, 3.8 Tg CH<sub>4</sub> yr<sup>-1</sup>) that are not accounted for in Equations 1-3, assuming that emissions from half of the region's lakes are the same as our study lakes (24.9 g CH<sub>4</sub> m<sup>-2</sup> yr<sup>-1</sup> with 15.8% thermokarst zone area), and emissions from the other half of the region's lakes reflect a 2-times larger thermokarst zone (43.7 g CH<sub>4</sub> m<sup>-2</sup> yr<sup>-1</sup> with 31.6% thermokarst zone area). Since lake area (as a percent of the yedoma region) is the largest source of variability influencing regional estimates of lake CH<sub>4</sub> emissions, we used a low-end estimate (11% lake area) in our calculations to be conservative. Other potential sources of variation that we have not estimated include the areal extent of yedoma, CH<sub>4</sub> flux and thermokarst erosion variation among lakes in different yedoma sub-regions, intra-lake flux variation for lakes with intense erosion, and interannual variation.

| Source of variability                             | Range of variability | Intensive study lakes<br>g CH <sub>4</sub> m <sup>-2</sup> yr <sup>-1</sup> | Average regional lakes<br>g CH <sub>4</sub> m <sup>-2</sup> yr <sup>-1</sup> | Regional flux<br>Tg CH <sub>4</sub> yr <sup>-1</sup> |
|---------------------------------------------------|----------------------|-----------------------------------------------------------------------------|------------------------------------------------------------------------------|------------------------------------------------------|
| Flux per point source <sup>†</sup>                | 36%                  | 16.0 to 33.5                                                                | 21.6 to 46.5                                                                 | 2.4 to 5.1                                           |
| Density of point sources <sup>‡</sup>             | 16%                  | 22.9 to 31.4                                                                | 30.4 to 42.2                                                                 | 3.3 to 4.6                                           |
| Between zones within lakes <sup>§</sup>           |                      | <i>Accounted for in calculations</i>                                        |                                                                              |                                                      |
| Between intensive study lakes                     | 9%                   | 22.7 to 27.2                                                                |                                                                              |                                                      |
| Between lakes with modest vs. intense thermokarst |                      | <i>Accounted for in calculations</i>                                        |                                                                              |                                                      |
| Lake area (percent of region) <sup>¶</sup>        | 46%                  |                                                                             |                                                                              | 2.9 to 10.3                                          |

† The range shown in the table is the mean flux minus the standard deviation for each point source category in each lake zone and the mean flux plus the standard deviation for each point source category in each lake zone using the mean density of point source types—i.e., the variation in flux among replicate bubble traps for a given point source type in a given lake zone.

α The range shown in the table applies the mean flux for each point source category to the mean density minus the standard deviation of density for each point source type in each lake zone and the mean density plus the standard deviation of density for each point source type in each lake zone—i.e., the variation in flux due to variation in density of a given point source type in a given lake zone.

β We accounted for variation between zones in our calculations (Supplementary Table 2). Methane emissions from the zone of shallow thermokarst margins had the highest flux.

γ Lake area estimates for sub-regions of yedoma territory are reported as 8.5% to >30%.

**Supplementary Table 2. Detailed calculation of annual CH<sub>4</sub> emissions from two intensively studied lakes. Whole-lake methane emissions are the area-weighted sum of emissions for each zone of the lake (thermokarst margins, deep center, and non-thermokarst margins). Methane fluxes are the sum of molecular diffusion and ebullition. The patchiness of ebullition is accounted for by quantifying ‘background’, ‘point-source’ and ‘hotspot’ bubbling. We calculated emission estimates for half of the region’s lakes with intense thermokarst erosion, which are not represented by our intensive study lakes, by doubling the area of thermokarst zones in this table and subtracting the difference from the deep center zone.**

| Lake   | Zone within lake | % Annual emissions |      | Area weighted mg CH <sub>4</sub> m <sup>-2</sup> yr <sup>-1</sup> |        | ← Subsection = mg CH <sub>4</sub> m <sup>-2</sup> yr <sup>-1</sup> |        | + Diffusion = mg CH <sub>4</sub> m <sup>-2</sup> yr <sup>-1</sup> |        | + Hotspots = mg CH <sub>4</sub> m <sup>-2</sup> yr <sup>-1</sup> |        | + Point sources = mg CH <sub>4</sub> m <sup>-2</sup> yr <sup>-1</sup> |        | + Background = mg CH <sub>4</sub> m <sup>-2</sup> yr <sup>-1</sup> |        | Bubble traps | n |
|--------|------------------|--------------------|------|-------------------------------------------------------------------|--------|--------------------------------------------------------------------|--------|-------------------------------------------------------------------|--------|------------------------------------------------------------------|--------|-----------------------------------------------------------------------|--------|--------------------------------------------------------------------|--------|--------------|---|
|        |                  | Area               |      | summer                                                            | winter | summer                                                             | winter | summer                                                            | summer | winter                                                           | summer | winter                                                                | summer | winter                                                             | summer |              |   |
| Tube   | Thermokarst      | 14%                | 76%  | 11,733                                                            | 8,910  | 86,272                                                             | 65,515 | 1,213                                                             | 9,316  | 18,782                                                           | 34,066 | 46,026                                                                | 41,677 | 707                                                                | 3      |              |   |
|        | Dispenser        | Deep center        | 81%  | 21%                                                               | 3,891  | 1,768                                                              | 4,828  | 2,193                                                             | 1,213  | 182                                                              | 366    | 1,049                                                                 | 1,417  | 2,384                                                              | 410    | 6            |   |
|        |                  | Non-thermokarst    | 6%   | 3%                                                                | 409    | 507                                                                | 7,046  | 8,739                                                             | 1,213  | 3,838                                                            | 7,739  | 184                                                                   | 248    | 1,811                                                              | 752    | 2            |   |
|        | Whole lake       | 100%               | 100% | 16,033                                                            | 11,185 |                                                                    |        | 1,213                                                             | 1,636  | 3,298                                                            | 5,489  | 7,416                                                                 | 7,695  | 471                                                                |        |              |   |
|        | % of annual flux |                    |      | 59%                                                               | 41%    |                                                                    |        | 4%                                                                | 18%    |                                                                  | 47%    | 30%                                                                   |        |                                                                    |        |              |   |
| Total  |                  |                    |      | 27,218                                                            |        |                                                                    |        | 1,213                                                             | 4,934  |                                                                  | 12,905 | 8,165                                                                 |        |                                                                    |        |              |   |
| Shuchi | Thermokarst      | 18%                | 82%  | 9,337                                                             | 9,355  | 51,889                                                             | 51,986 | 1,425                                                             | 1,448  | 3,450                                                            | 35,369 | 47,786                                                                | 13,647 | 750                                                                | 2      |              |   |
|        | Deep center      | 79%                | 17%  | 2,694                                                             | 1,065  | 3,410                                                              | 1,349  | 1,425                                                             | 42     | 101                                                              | 601    | 812                                                                   | 1,342  | 436                                                                | 10     |              |   |
|        | Non-thermokarst  | 3%                 | 1%   | 162                                                               | 45     | 5,373                                                              | 1,480  | 1,425                                                             | 111    | 264                                                              | 309    | 417                                                                   | 3,528  | 799                                                                | 2      |              |   |
|        | Whole lake       | 100%               | 100% | 12,193                                                            | 10,465 |                                                                    |        | 1,425                                                             | 297    | 709                                                              | 6,849  | 9,253                                                                 | 3,622  | 503                                                                |        |              |   |
|        | % of annual flux |                    |      | 54%                                                               | 46%    |                                                                    |        | 6%                                                                | 4%     |                                                                  | 71%    | 18%                                                                   |        |                                                                    |        |              |   |
| Total  |                  |                    |      | 22,658                                                            |        |                                                                    |        | 1,425                                                             | 1,006  |                                                                  | 16,101 | 4,126                                                                 |        |                                                                    |        |              |   |

## Supplementary Notes

### Reference

31. M. Stuiver, M. & H. Polach. Reporting of  $^{14}\text{C}$  data. *Radiocarbon*. **19**, 355-363 (1977).
